# Supplementary material
Source: MDPI journal article supplement (https://www.mdpi.com/2311-553X/7/3/49)
Supplement: s1 [file s1]

**Supplementary Material S3.** Up- and down-regulated pathways by silencing with TG2-lncRNA. The functional classification was performed using PANTHERdb web-tool (<http://www.pantherdb.org/>). For each highly represented pathway, the most dysregulated genes are shown, coupled with their relative Log<sub>2</sub>FC value.

| GeneID                                                        | log2FoldChange | Family/Subfamily                                                |
|---------------------------------------------------------------|----------------|-----------------------------------------------------------------|
| <b><i>Gonadotropin-releasing hormone receptor pathway</i></b> |                |                                                                 |
| INHBA                                                         | 2.425807846    | Inhibin beta A chain                                            |
| GNB4                                                          | 1.56518265     | Guanine nucleotide-binding protein subunit beta-4               |
| KAT2B                                                         | 1.542392787    | Histone acetyltransferase KAT2B                                 |
| ATF3                                                          | 1.401037001    | Cyclic AMP-dependent transcription factor ATF-3                 |
| MAP3K8                                                        | 1.10551389     | Mitogen-activated protein kinase kinase kinase 8                |
| PLA2G4C                                                       | 0.822500585    | Cytosolic phospholipase A2 gamma                                |
| SMAD1                                                         | 0.578849775    | Mothers against decapentaplegic homolog 1                       |
| STAT3                                                         | 0.550107469    | Signal transducer and activator of transcription 3              |
| MAP3K5                                                        | 0.546003554    | Mitogen-activated protein kinase kinase kinase 5                |
| ACVR2A                                                        | 0.48573124     | Activin receptor type-2A                                        |
| EIF2AK3                                                       | 0.481983856    | Eukaryotic translation initiation factor 2-alpha kinase 3       |
| IRS2                                                          | 0.471109453    | Insulin receptor substrate 2                                    |
| DUSP1                                                         | 0.376482976    | Dual specificity protein phosphatase 1                          |
| ID2                                                           | 0.371542228    | DNA-binding protein inhibitor ID-2                              |
| JUN                                                           | 0.355541686    | Transcription factor AP-1                                       |
| JUND                                                          | 0.351257043    | Transcription factor jun-D                                      |
| EGR1                                                          | 0.340900989    | Early growth response protein 1                                 |
| BMPR2                                                         | 0.33405844     | Bone morphogenetic protein receptor type-2                      |
| CDC42                                                         | 0.3263491      | Cell division control protein 42 homolog                        |
| FOSB                                                          | 0.324439134    | Protein fosB                                                    |
| SMAD3                                                         | 0.31714702     | Mothers against decapentaplegic homolog 3                       |
| PIK3R1                                                        | 0.285183025    | Phosphatidylinositol 3-kinase regulatory subunit alpha          |
| MAP3K13                                                       | 0.269800744    | Mitogen-activated protein kinase kinase kinase 13               |
| RAC1                                                          | 0.269592794    | Ras-related C3 botulinum toxin substrate 1                      |
| ADIPOR2                                                       | 0.264267565    | Adiponectin receptor protein 2                                  |
| GNAI3                                                         | 0.260570907    | Guanine nucleotide-binding protein G(k) subunit alpha           |
| PEA15                                                         | 0.251163921    | Astrocytic phosphoprotein PEA-15                                |
| <b><i>Apoptosis signaling pathway</i></b>                     |                |                                                                 |
| TNFSF10                                                       | 6.173249056    | Tumor necrosis factor ligand superfamily member 10              |
| EIF2AK2                                                       | 2.158342077    | Interferon-induced double-stranded RNA-activated protein kinase |
| CASP7                                                         | 1.650905351    | Caspase-7                                                       |
| ATF3                                                          | 1.401037001    | Cyclic AMP-dependent transcription factor ATF-3                 |
| BIRC3                                                         | 1.378687927    | Baculoviral IAP repeat-containing protein 3                     |
| CASP8                                                         | 1.341232621    | Caspase-8                                                       |
| FAS                                                           | 0.908303844    | Tumor necrosis factor receptor superfamily member 6             |
| CFLAR                                                         | 0.733110642    | CASP8 and FADD-like apoptosis regulator                         |
| MCL1                                                          | 0.703922041    | Induced myeloid leukemia cell differentiation protein Mcl-1     |
| NFKBIA                                                        | 0.614437952    | NF-kappa-B inhibitor alpha                                      |

|           |             |                                                        |
|-----------|-------------|--------------------------------------------------------|
| RIPK1     | 0.59073616  | Receptor-interacting serine/threonine-protein kinase 1 |
| MAP3K5    | 0.546003554 | Mitogen-activated protein kinase kinase kinase 5       |
| HSPA5     | 0.460457838 | Endoplasmic reticulum chaperone BiP                    |
| BIRC2     | 0.441274559 | Baculoviral IAP repeat-containing protein 2            |
| TNFRSF10A | 0.426137216 | Tumor necrosis factor receptor superfamily member 10A  |
| ATF4      | 0.390241923 | Cyclic AMP-dependent transcription factor ATF-4        |
| JUN       | 0.355541686 | Transcription factor AP-1                              |
| XIAP      | 0.321299731 | E3 ubiquitin-protein ligase XIAP                       |
| BAG3      | 0.316405178 | BAG family molecular chaperone regulator 3             |
| BCL2L11   | 0.312519757 | Bcl-2-like protein 11                                  |
| EIF2S1    | 0.280639445 | Eukaryotic translation initiation factor 2 subunit 1   |

### ***CCKR signaling map***

|        |             |                                                                                                                         |
|--------|-------------|-------------------------------------------------------------------------------------------------------------------------|
| BIRC3  | 1.378687927 | Baculoviral IAP repeat-containing protein 3                                                                             |
| PRKD2  | 1.347771687 | Serine/threonine-protein kinase D1                                                                                      |
| HBEGF  | 0.994881555 | Proheparin-binding EGF-like growth factor                                                                               |
| KLF4   | 0.958279183 | Krueppel-like factor 4                                                                                                  |
| MCL1   | 0.703922041 | Induced myeloid leukemia cell differentiation protein Mcl-1                                                             |
| NFKBIA | 0.614437952 | NF-kappa-B inhibitor alpha                                                                                              |
| JAK2   | 0.5852736   | Tyrosine-protein kinase JAK2                                                                                            |
| STAT3  | 0.550107469 | Signal transducer and activator of transcription 3                                                                      |
| BIRC2  | 0.441274559 | Baculoviral IAP repeat-containing protein 2                                                                             |
| RHEB   | 0.357486174 | GTP-binding protein Rheb                                                                                                |
| JUN    | 0.355541686 | Transcription factor AP-1                                                                                               |
| ELK4   | 0.351442404 | ETS domain-containing protein Elk-4                                                                                     |
| PDK1   | 0.345893494 | 3-phosphoinositide-dependent protein kinase 1                                                                           |
| EGR1   | 0.340900989 | Early growth response protein 1                                                                                         |
| PKD2   | 0.340058515 | Serine/threonine-protein kinase D2                                                                                      |
| CDC42  | 0.3263491   | Cell division control protein 42 homolog<br>Phosphatidylinositol 3.4.5-trisphosphate 3-phosphatase and dual-specificity |
| TEP1   | 0.295990766 | protein phosphatase PTEN                                                                                                |
| EIF4E  | 0.295727168 | Eukaryotic translation initiation factor 4E                                                                             |
| PIK3R1 | 0.285183025 | Phosphatidylinositol 3-kinase regulatory subunit alpha                                                                  |
| RAC1   | 0.269592794 | Ras-related C3 botulinum toxin substrate 1;RAC1;ortholog                                                                |
| YWHAB  | 0.232205336 | 14-3-3 protein beta/alpha                                                                                               |
| CDH1   | 0.203481454 | Cadherin-1                                                                                                              |

### ***PDGF signaling pathway***

|         |             |                                                               |
|---------|-------------|---------------------------------------------------------------|
| STAT1   | 2.844671677 | Signal transducer and activator of transcription 1-alpha/beta |
| STAT2   | 2.40513065  | Signal transducer and activator of transcription 2            |
| STAT5A  | 1.813281567 | Signal transducer and activator of transcription 5A           |
| PDGFR   | 0.730025882 | Platelet-derived growth factor receptor-like protein          |
| EHF     | 0.59690827  | ETS homologous factor                                         |
| JAK2    | 0.5852736   | Tyrosine-protein kinase JAK2                                  |
| STAT3   | 0.550107469 | Signal transducer and activator of transcription 3            |
| RPS6KC1 | 0.533161081 | Ribosomal protein S6 kinase delta-1                           |

|          |             |                                                        |
|----------|-------------|--------------------------------------------------------|
| ARHGAP27 | 0.531272325 | Rho GTPase-activating protein 27                       |
| ELF1     | 0.528234983 | ETS-related transcription factor Elf-1                 |
| GAB1     | 0.366045108 | GRB2-associated-binding protein 1                      |
| JUN      | 0.355541686 | Transcription factor AP-1                              |
| ELK4     | 0.351442404 | ETS domain-containing protein Elk-4                    |
| PDK1     | 0.345893494 | 3-phosphoinositide-dependent protein kinase 1          |
| ARHGAP12 | 0.331602857 | Rho GTPase-activating protein 12                       |
| NCK1     | 0.323048126 | Cytoplasmic protein NCK1                               |
| SRGAP1   | 0.306900148 | SLIT-ROBO Rho GTPase-activating protein 1              |
| PIK3R1   | 0.285183025 | Phosphatidylinositol 3-kinase regulatory subunit alpha |
| PIK3R3   | 0.262079328 | Phosphatidylinositol 3-kinase regulatory subunit gamma |

### ***Inflammation mediated by chemokine and cytokine signaling pathway***

|        |             |                                                                                                                         |
|--------|-------------|-------------------------------------------------------------------------------------------------------------------------|
| CCL22  | 4.463931916 | C-C motif chemokine 22                                                                                                  |
| CCL5   | 3.350672845 | C-C motif chemokine 5                                                                                                   |
| IL15   | 2.931601231 | Interleukin-15                                                                                                          |
| STAT1  | 2.844671677 | Signal transducer and activator of transcription 1-alpha/beta                                                           |
| FPR3   | 1.920739943 | N-formyl peptide receptor 3                                                                                             |
| CCR1   | 1.82943547  | C-C chemokine receptor type 1                                                                                           |
| NFKBIA | 0.614437952 | NF-kappa-B inhibitor alpha                                                                                              |
| JAK2   | 0.5852736   | Tyrosine-protein kinase JAK2                                                                                            |
| STAT3  | 0.550107469 | Signal transducer and activator of transcription 3                                                                      |
| CXCR4  | 0.518688609 | C-X-C chemokine receptor type 4                                                                                         |
| GNG5   | 0.446618845 | Guanine nucleotide-binding protein G(I)/G(S)/G(O) subunit gamma-5                                                       |
| IFNGR1 | 0.412321764 | Interferon gamma receptor 1                                                                                             |
| JUN    | 0.355541686 | Transcription factor AP-1                                                                                               |
| JUND   | 0.351257043 | Transcription factor jun-D                                                                                              |
| PDK1   | 0.345893494 | 3-phosphoinositide-dependent protein kinase 1                                                                           |
| CDC42  | 0.3263491   | Cell division control protein 42 homolog<br>Phosphatidylinositol 3.4.5-trisphosphate 3-phosphatase and dual-specificity |
| TEP1   | 0.295990766 | protein phosphatase PTEN                                                                                                |
| RAC1   | 0.269592794 | Ras-related C3 botulinum toxin substrate 1                                                                              |
| GNAI3  | 0.260570907 | Guanine nucleotide-binding protein G(k) subunit alpha                                                                   |

### ***Integrin signalling pathway***

|        |             |                                                        |
|--------|-------------|--------------------------------------------------------|
| LAMC2  | 1.0641345   | Laminin subunit gamma-2                                |
| RND1   | 0.702723654 | Rho-related GTP-binding protein Rho6                   |
| MAP3K5 | 0.546003554 | Mitogen-activated protein kinase kinase kinase 5       |
| RND3   | 0.533645576 | Rho-related GTP-binding protein RhoE                   |
| LAMB1  | 0.404323201 | Laminin subunit beta-1                                 |
| FN1    | 0.347057259 | Fibronectin                                            |
| PTPN12 | 0.334770982 | Tyrosine-protein phosphatase non-receptor type 12      |
| SLK    | 0.327032119 | Tyrosine-protein kinase Fyn                            |
| CDC42  | 0.3263491   | Cell division control protein 42 homolog               |
| ELMO2  | 0.287811232 | Engulfment and cell motility protein 2                 |
| PIK3R1 | 0.285183025 | Phosphatidylinositol 3-kinase regulatory subunit alpha |

|        |                |                                                        |
|--------|----------------|--------------------------------------------------------|
| ARF6   | 0.279626974    | ADP-ribosylation factor 6                              |
| RAC1   | 0.269592794    | Ras-related C3 botulinum toxin substrate 1             |
| ARL1   | 0.26744603     | ADP-ribosylation factor-like protein 1                 |
| PIK3R3 | 0.262079328    | Phosphatidylinositol 3-kinase regulatory subunit gamma |
| CRKL   | 0.253468554    | Crk-like protein                                       |
| GeneID | log2FoldChange | Family/Subfamily                                       |

### ***Huntington disease***

|         |              |                                                                   |
|---------|--------------|-------------------------------------------------------------------|
| GRIN3B  | -1.527141118 | Glutamate receptor ionotropic. NMDA 3B                            |
| GRIN1   | -1.445339444 | Glutamate receptor ionotropic. NMDA 1                             |
| GRIN2C  | -1.120595251 | Glutamate receptor ionotropic. NMDA 2C                            |
| CAPN10  | -1.074198348 | Calpain-10                                                        |
| TP63    | -0.993790699 | Tumor protein 63                                                  |
| NCOR2   | -0.898026076 | Nuclear receptor corepressor 2                                    |
| TUBB3   | -0.894214098 | Tubulin beta-3 chain                                              |
| RAC3    | -0.880877763 | Ras-related C3 botulinum toxin substrate 3                        |
| GRIN2D  | -0.821548402 | Glutamate receptor ionotropic. NMDA 2D                            |
| CAPN12  | -0.80848351  | Calpain-12                                                        |
| GRIK3   | -0.783870575 | Glutamate receptor ionotropic. kainate 3                          |
| AP2A1   | -0.686463563 | AP-2 complex subunit alpha-1                                      |
| AKT1    | -0.664943358 | RAC-alpha serine/threonine-protein kinase                         |
| ARPC1B  | -0.653738979 | Actin-related protein 2/3 complex subunit 1B                      |
| MAP3K10 | -0.643977467 | Mitogen-activated protein kinase kinase kinase 10                 |
| GAPDHS  | -0.62229233  | Glyceraldehyde-3-phosphate dehydrogenase. testis-specific         |
| CAPN5   | -0.621990729 | Calpain-5                                                         |
| PACSIN1 | -0.60602791  | Protein kinase C and casein kinase substrate in neurons protein 1 |
| CAPN1   | -0.597666462 | Calpain-1 catalytic subunit                                       |
| MAP2K7  | -0.587577916 | Dual specificity mitogen-activated protein kinase kinase 7        |
| SIN3B   | -0.575191406 | Paired amphipathic helix protein Sin3b                            |
| TP73    | -0.542506655 | Tumor protein p73                                                 |
| DNAH1   | -0.505631272 | Dynein heavy chain 1. axonemal                                    |
| BAX     | -0.488672159 | Apoptosis regulator BAX                                           |
| DNAL4   | -0.485788777 | Dynein light chain 4. axonemal                                    |
| AKT2    | -0.469498922 | RAC-beta serine/threonine-protein kinase                          |
| VAT1    | -0.461990287 | Synaptic vesicle membrane protein VAT-1 homolog                   |
| CYC1    | -0.455620854 | Cytochrome c1. heme protein. mitochondrial                        |
| TUBB4B  | -0.413026507 | Tubulin beta-4B chain                                             |
| AP2A2   | -0.405588568 | AP-2 complex subunit alpha-2                                      |
| CLTB    | -0.364207241 | Clathrin light chain B                                            |
| ARF5    | -0.359499384 | ADP-ribosylation factor 5                                         |
| DCTN1   | -0.341504673 | Dynactin subunit 1                                                |
| ARPC1A  | -0.320977045 | Actin-related protein 2/3 complex subunit 1A                      |
| ARF1    | -0.319753767 | ADP-ribosylation factor 1                                         |
| CYFIP1  | -0.293103703 | Cytoplasmic FMR1-interacting protein 1                            |
| TUBB    | -0.273216404 | Tubulin beta chain                                                |
| HIP1    | -0.261874709 | Huntingtin-interacting protein 1                                  |

ACTB -0.23044627 Actin. cytoplasmic 1

### ***Integrin signalling pathway***

LAMA5 -1.617190413 Laminin subunit alpha-5  
BCAR1 -1.064359848 Breast cancer anti-estrogen resistance protein 1  
COL6A2 -1.058182594 Collagen alpha-2(VI) chain  
COL18A1 -1.049529373 Collagen alpha-1(XVIII) chain  
COL9A3 -0.948836499 Collagen alpha-3(IX) chain  
ITGB4 -0.936037674 Integrin beta-4  
CSK -0.887200331 Tyrosine-protein kinase CSK  
COL6A1 -0.877090331 Collagen alpha-1(VI) chain  
COL12A1 -0.838607177 Collagen alpha-1(XII) chain  
SH3GL1 -0.836416353 Endophilin-A2;SH3GL1  
HRAS -0.807512006 GTPase Hras  
ARFGAP1 -0.807081849 ADP-ribosylation factor GTPase-activating protein 1  
RRAS -0.781740215 Ras-related protein R-Ras  
RND2 -0.746526739 Rho-related GTP-binding protein RhoN  
COL11A2 -0.737636099 Collagen alpha-2(XI) chain  
COL27A1 -0.713444202 Collagen alpha-1(XXVII) chain  
LAMB2 -0.6775181 Laminin subunit gamma-1  
LAMB2 -0.6775181 Laminin subunit beta-2  
MAP2K2 -0.659588191 Dual specificity mitogen-activated protein kinase kinase 2  
ARPC1B -0.653738979 Actin-related protein 2/3 complex subunit 1B  
PIK3R2 -0.616559673 Phosphatidylinositol 3-kinase regulatory subunit beta  
ITGA2B -0.572574536 Integrin alpha-IIb  
TLN1 -0.557883692 Talin-1  
MAPK3 -0.536386507 Mitogen-activated protein kinase 3  
RHOB -0.513967594 Rho-related GTP-binding protein RhoB  
MICALL1 -0.47127199 MICAL-like protein 1  
COL1A1 -0.467055191 Collagen alpha-1(I) chain  
ACTN4 -0.458228924 Alpha-actinin-4  
COL5A1 -0.444272098 Collagen alpha-1(V) chain  
MAP3K3 -0.409075186 Mitogen-activated protein kinase kinase kinase 3  
FLNB -0.399801824 Filamin-B;FLNB  
RHOC -0.344791739 Rho-related GTP-binding protein RhoC  
MAPK13 -0.321707445 Mitogen-activated protein kinase 13  
ARPC1A -0.320977045 Actin-related protein 2/3 complex subunit 1A  
PXN -0.320939119 Paxillin  
ARF1 -0.319753767 ADP-ribosylation factor 1  
Phosphatidylinositol 4-phosphate 3-kinase C2 domain-containing  
PIK3C2B -0.282797065 subunit beta  
ACTB -0.23044627 Actin cytoplasmic 1

### ***Inflammation mediated by chemokine and cytokine signaling pathway***

VWF -1.058886323 von Willebrand factor  
COL6A2 -1.058182594 Collagen alpha-2(VI) chain

|         |              |                                                                                                                    |
|---------|--------------|--------------------------------------------------------------------------------------------------------------------|
| GNAO1   | -0.950015155 | Guanine nucleotide-binding protein G(o) subunit alpha                                                              |
| RAC3    | -0.880877763 | Ras-related C3 botulinum toxin substrate 3                                                                         |
| COL6A1  | -0.877090331 | Collagen alpha-1(VI) chain                                                                                         |
| COL12A1 | -0.838607177 | Collagen alpha-1(XII) chain                                                                                        |
| RRAS    | -0.781740215 | Ras-related protein R-Ras                                                                                          |
| PAK4    | -0.74480369  | Serine/threonine-protein kinase PAK 4                                                                              |
| GRK6    | -0.741761596 | G protein-coupled receptor kinase 6                                                                                |
| PLCB3   | -0.684497523 | 1-phosphatidylinositol 4.5-bisphosphate phosphodiesterase beta-3                                                   |
| BCL3    | -0.666240556 | B-cell lymphoma 3 protein                                                                                          |
| AKT1    | -0.664943358 | RAC-alpha serine/threonine-protein kinase                                                                          |
| ADRBK1  | -0.661630082 | Beta-adrenergic receptor kinase 1                                                                                  |
| ARPC1B  | -0.653738979 | Actin-related protein 2/3 complex subunit 1B<br>Phosphatidylinositol 3.4.5-trisphosphate-dependent Rac exchanger 1 |
| PREX1   | -0.651782791 | protein                                                                                                            |
| GNB3    | -0.644440001 | Guanine nucleotide-binding protein G(I)/G(S)/G(T) subunit beta-3                                                   |
| TYK2    | -0.631624035 | Non-receptor tyrosine-protein kinase TYK2                                                                          |
| CISH    | -0.588017295 | Cytokine-inducible SH2-containing protein                                                                          |
| JUNB    | -0.544523709 | Transcription factor jun-B                                                                                         |
| GNA11   | -0.544467554 | Guanine nucleotide-binding protein subunit alpha-11                                                                |
| MYH9    | -0.538916508 | Myosin-9                                                                                                           |
| MAPK3   | -0.536386507 | Mitogen-activated protein kinase 3                                                                                 |
| ARRB1   | -0.533189068 | Beta-arrestin-1;ARRB1                                                                                              |
| ITPR3   | -0.521678468 | Inositol 1.4.5-trisphosphate receptor type 3                                                                       |
| AKT2    | -0.469498922 | RAC-beta serine/threonine-protein kinase                                                                           |
| ALOX15  | -0.461284628 | Arachidonate 15-lipoxygenase                                                                                       |
| PRKCZ   | -0.426168221 | Protein kinase C zeta type                                                                                         |
| VAV1    | -0.419709425 | Proto-oncogene vav                                                                                                 |
| INPPL1  | -0.409332916 | Phosphatidylinositol 3.4.5-trisphosphate 5-phosphatase 2                                                           |
| SOCS7   | -0.382640297 | Suppressor of cytokine signaling 7                                                                                 |
| SOCS7   | -0.382640297 | Suppressor of cytokine signaling 4                                                                                 |
| RHOC    | -0.344791739 | Rho-related GTP-binding protein RhoC                                                                               |
| NFKB2   | -0.344585361 | Nuclear factor NF-kappa-B p100 subunit                                                                             |
| MYLK    | -0.337938238 | Myosin light chain kinase smooth muscle                                                                            |
| ARPC1A  | -0.320977045 | Actin-related protein 2/3 complex subunit 1A                                                                       |
| CYTH2   | -0.301795304 | Cytohesin-2                                                                                                        |
| PLCG1   | -0.258462189 | 1-phosphatidylinositol 4.5-bisphosphate phosphodiesterase gamma-1                                                  |
| ACTB    | -0.23044627  | Actin. cytoplasmic 1                                                                                               |

### ***Gonadotropin-releasing hormone receptor pathway***

|        |              |                                                                  |
|--------|--------------|------------------------------------------------------------------|
| AMH    | -1.022806169 | Muellerian-inhibiting factor                                     |
| GNAO1  | -0.950015155 | Guanine nucleotide-binding protein G(o) subunit alpha            |
| DGKZ   | -0.856118407 | Diacylglycerol kinase zeta                                       |
| MAPK12 | -0.854621835 | Mitogen-activated protein kinase 12                              |
| GNB2   | -0.81907454  | Guanine nucleotide-binding protein G(I)/G(S)/G(T) subunit beta-2 |
| HRAS   | -0.807512006 | GTPase Hras                                                      |
| ESRRA  | -0.791927125 | Steroid hormone receptor ERR1                                    |

|         |              |                                                                  |
|---------|--------------|------------------------------------------------------------------|
| MAP4K2  | -0.782468132 | Mitogen-activated protein kinase kinase kinase 2                 |
| CRTC1   | -0.759738314 | CREB-regulated transcription coactivator 1                       |
| MAP3K11 | -0.753563275 | Mitogen-activated protein kinase kinase kinase 11                |
| PLA2G6  | -0.728646195 | 85/88 kDa calcium-independent phospholipase A2                   |
| TCF3    | -0.726388628 | Transcription factor 7-like 1                                    |
| SDF4    | -0.718213976 | 45 kDa calcium-binding protein                                   |
| GATA4   | -0.685087013 | Transcription factor GATA-4                                      |
| AKT1    | -0.664943358 | RAC-alpha serine/threonine-protein kinase                        |
| MAP2K2  | -0.659588191 | Dual specificity mitogen-activated protein kinase kinase 2       |
| PRKAR1B | -0.658646115 | cAMP-dependent protein kinase type I-beta regulatory subunit     |
| GNB3    | -0.644440001 | Guanine nucleotide-binding protein G(I)/G(S)/G(T) subunit beta-3 |
| MAP3K10 | -0.643977467 | Mitogen-activated protein kinase kinase kinase 10                |
| MAPK11  | -0.600193    | Mitogen-activated protein kinase 11                              |
| MAP2K7  | -0.587577916 | Dual specificity mitogen-activated protein kinase kinase 7       |
| PER1    | -0.570285483 | Period circadian protein homolog 1                               |
| JUNB    | -0.544523709 | Transcription factor jun-B                                       |
| GNA11   | -0.544467554 | Guanine nucleotide-binding protein subunit alpha-11              |
| ADCY1   | -0.537621199 | Adenylate cyclase type 1                                         |
| INHBB   | -0.536771596 | Inhibin beta B chain                                             |
| MAPK3   | -0.536386507 | Mitogen-activated protein kinase 3                               |
| ITPR3   | -0.521678468 | Inositol 1.4.5-trisphosphate receptor type 3                     |
| ALOX15  | -0.461284628 | Arachidonate 15-lipoxygenase                                     |
| PRKCZ   | -0.426168221 | Protein kinase C zeta type                                       |
| DNM1    | -0.421597215 | Dynamin-1                                                        |
| PGR     | -0.416331499 | Progesterone receptor                                            |
| MAP3K3  | -0.409075186 | Mitogen-activated protein kinase kinase kinase 3                 |
| LDB1    | -0.400519621 | LIM domain-binding protein 1                                     |
| GATA2   | -0.386205382 | Endothelial transcription factor GATA-2                          |
| MAPK13  | -0.321707445 | Mitogen-activated protein kinase 13                              |
| PXN     | -0.320939119 | Paxillin                                                         |

### ***Wnt signaling pathway***

|         |              |                                                                    |
|---------|--------------|--------------------------------------------------------------------|
| APC2    | -1.168306861 | Adenomatous polyposis coli protein 2                               |
| FZD2    | -1.08090775  | Frizzled-2                                                         |
| DVL1    | -1.036327016 | Segment polarity protein dishevelled homolog DVL-1                 |
| DVL1    | -1.036327016 | Putative segment polarity protein dishevelled homolog DVL1P1       |
| LRP5    | -0.986651347 | Low-density lipoprotein receptor-related protein 5                 |
| KREMEN2 | -0.957393419 | Kremen protein 2                                                   |
| CSNK1G2 | -0.944342478 | Casein kinase I isoform gamma-2                                    |
| GNG13   | -0.939964974 | Guanine nucleotide-binding protein G(I)/G(S)/G(O) subunit gamma-13 |
| TLE2    | -0.824544366 | Transducin-like enhancer protein 2                                 |
| GNB2    | -0.81907454  | Guanine nucleotide-binding protein G(I)/G(S)/G(T) subunit beta-2   |
| TCF3    | -0.726388628 | Transcription factor 7-like 1                                      |
| PCDHA3  | -0.695359572 | Protocadherin alpha-3                                              |
| PCDHA5  | -0.684954931 | Protocadherin alpha-5                                              |
| PLCB3   | -0.684497523 | 1-phosphatidylinositol 4.5-bisphosphate phosphodiesterase beta-3   |

|         |              |                                                                  |
|---------|--------------|------------------------------------------------------------------|
| PCDH1   | -0.668008224 | Protocadherin-1                                                  |
| PPARD   | -0.644789773 | Peroxisome proliferator-activated receptor delta                 |
| GNB3    | -0.644440001 | Guanine nucleotide-binding protein G(I)/G(S)/G(T) subunit beta-3 |
| B4GALT7 | -0.630943238 | Beta-1.4-galactosyltransferase 7                                 |
| BCL9    | -0.625074731 | B-cell CLL/lymphoma 9 protein                                    |
| KREMEN1 | -0.601417862 | Kremen protein 1                                                 |
| DVL2    | -0.590275263 | Segment polarity protein dishevelled homolog DVL-2               |
| SMARCA4 | -0.557239697 | Transcription activator BRG1                                     |
| CELSR1  | -0.550420168 | Cadherin EGF LAG seven-pass G-type receptor 1                    |
| GNA11   | -0.544467554 | Guanine nucleotide-binding protein subunit alpha-11              |
| AXIN1   | -0.542558775 | Axin-1                                                           |
| ARRB1   | -0.533189068 | Beta-arrestin-1                                                  |
| PCDH19  | -0.526369617 | Protocadherin-19                                                 |
| LRP5L   | -0.524758537 | Low-density lipoprotein receptor-related protein 5-like protein  |
| PCDH7   | -0.524236384 | Protocadherin-7                                                  |
| ITPR3   | -0.521678468 | Inositol 1.4.5-trisphosphate receptor type 3                     |
| AES     | -0.500060358 | TLE family member 5                                              |
| PRKCZ   | -0.426168221 | Protein kinase C zeta type                                       |
| DVL3    | -0.341295119 | Segment polarity protein dishevelled homolog DVL-3               |
| CTBP1   | -0.296273507 | C-terminal-binding protein 1                                     |
| TLE3    | -0.265267952 | Transducin-like enhancer protein 3                               |
| ARID1A  | -0.251612731 | AT-rich interactive domain-containing protein 1A                 |
| ACTB    | -0.23044627  | Actin. cytoplasmic 1                                             |

### ***Angiogenesis***

|        |              |                                                              |
|--------|--------------|--------------------------------------------------------------|
| PKD1   | -1.247281967 | Serine/threonine-protein kinase D1                           |
| HSPB1  | -1.194113008 | Heat shock protein beta-1                                    |
| APC2   | -1.168306861 | Adenomatous polyposis coli protein 2                         |
| FZD2   | -1.08090775  | Frizzled-2                                                   |
| DVL1   | -1.036327016 | Segment polarity protein dishevelled homolog DVL-1           |
| DVL1   | -1.036327016 | Putative segment polarity protein dishevelled homolog DVL1P1 |
| EFNB2  | -0.926870711 | Ephrin-B2                                                    |
| SPHK2  | -0.842281094 | Sphingosine kinase 2                                         |
| HRAS   | -0.807512006 | GTPase Hras                                                  |
| JAG2   | -0.770567304 | Protein jagged-2                                             |
| NOTCH1 | -0.74020498  | Neurogenic locus notch homolog protein 1                     |
| AKT1   | -0.664943358 | RAC-alpha serine/threonine-protein kinase                    |
| MAP2K2 | -0.659588191 | Dual specificity mitogen-activated protein kinase kinase 2   |
| EPHB3  | -0.651298154 | Ephrin type-B receptor 3                                     |
| PIK3R2 | -0.616559673 | Phosphatidylinositol 3-kinase regulatory subunit beta        |
| EFNB1  | -0.602478098 | Ephrin-B1                                                    |
| DVL2   | -0.590275263 | Segment polarity protein dishevelled homolog DVL-2           |
| PLD2   | -0.585104698 | Phospholipase D2                                             |
| AXIN1  | -0.542558775 | Axin-1                                                       |
| GRB7   | -0.536691043 | Growth factor receptor-bound protein 7                       |
| PDGFB  | -0.536644982 | Platelet-derived growth factor subunit B                     |



|         |              |                                                                   |
|---------|--------------|-------------------------------------------------------------------|
| MAPK3   | -0.536386507 | Mitogen-activated protein kinase 3                                |
| MAPK3   | -0.536386507 | MAP kinase-activated protein kinase 3                             |
| RHOB    | -0.513967594 | Rho-related GTP-binding protein RhoB                              |
| SCAP    | -0.49474368  | SH2 domain-containing protein 2A                                  |
| AKT2    | -0.469498922 | RAC-beta serine/threonine-protein kinase                          |
| PRKCZ   | -0.426168221 | Protein kinase C zeta type                                        |
| FGFR1   | -0.359581042 | Fibroblast growth factor receptor 1                               |
| RHOC    | -0.344791739 | Rho-related GTP-binding protein RhoC                              |
| DVL3    | -0.341295119 | Segment polarity protein dishevelled homolog DVL-3                |
| BIRC5   | -0.329225606 | Baculoviral IAP repeat-containing protein 5                       |
| PXN     | -0.320939119 | Paxillin                                                          |
|         |              | Phosphatidylinositol 4-phosphate 3-kinase C2 domain-containing    |
| PIK3C2B | -0.282797065 | subunit beta                                                      |
| PLCG1   | -0.258462189 | 1-phosphatidylinositol 4.5-bisphosphate phosphodiesterase gamma-1 |
