# Supplementary material
Source: MDPI journal article supplement (https://www.mdpi.com/2311-553X/7/3/49)
Supplement: s1 [file s1]

**Supplementary Table S1.** Primer pairs used in RT-qPCR.

| Primer       | Sequence                         | PCR size (bp) | PCR conditions                                                              |
|--------------|----------------------------------|---------------|-----------------------------------------------------------------------------|
| HPRT1F       | 5'-TGACACTGGCAAAACAATGCA-3'      | 94            | 50°C 2 min<br>95°C 10 min<br><u>45 cycles:</u><br>95°C 20 sec<br>60°C 1 min |
| HPRT1R       | 5'-GGTCCTTTTCACCAGCAAGCT-3'      |               |                                                                             |
| lncRNA F     | 5'-TCACGTTCTGCAACCCTAGAC-3'      | 117           | 50°C 2 min<br>95°C 10 min<br><u>45 cycles:</u><br>95°C 20 sec<br>60°C 1 min |
| lncRNA R     | 5'- GGGGTCTTGGGGGAAAACAAA-3'     |               |                                                                             |
| TGM2Fex11-12 | 5'-CCTTACGGAGTCCAACCTCA-3'       | 152           | 50°C 2 min<br>95°C 10 min<br><u>45 cycles:</u><br>95°C 15 sec<br>60°C 1 min |
| TGM2Rex11-12 | 5'-CCAGCTTGCGTTTCTGCTTG-3'       |               |                                                                             |
| Fshort3ex    | 5'-TCATGAGCACCCCTCCTTTCT-3'      | 377           | 50°C 2 min<br>95°C 10 min<br><u>45 cycles:</u><br>95°C 15 sec<br>62°C 1 min |
| Rshort3ex    | 5'-GGTCCATTCTCACCTTAACCTTCCT -3' |               |                                                                             |
| F2TGH        | 5'-TACAAATACCCAGAGGGGTCC-3'      | 338           | 50°C 2 min<br>95°C 10 min<br><u>45 cycles:</u><br>95°C 30 sec<br>62°C 1 min |
| F2TGH        | 5'-ATGTTGTCAGTTGGCGGTCA-3'       |               |                                                                             |
| FGATA3Ex     | 5'-CAGCACAGAAGGCAGGGAG-3'        | 197           | 50°C 2 min<br>95°C 10 min<br><u>45 cycles:</u><br>95°C 20 sec<br>60°C 1 min |
| RGATA3Ex     | 5'-TCTGACAGTTCGCACAGGAC-3'       |               |                                                                             |
| F-STAT1      | 5'-TGTTATGGGACCGCACCTTC-3'       | 152           | 50°C 2 min<br>95°C 10 min<br><u>45 cycles:</u><br>95°C 20 sec<br>60°C 1 min |
| R-STAT1      | 5'-CTCATTCACATCTCTCAACTTCACA-3'  |               |                                                                             |
| F-STAT2      | 5'-GCCAAAGGGAAGACACCCTC-3'       | 284           | 50°C 2 min<br>95°C 10 min<br><u>45 cycles:</u><br>95°C 20 sec               |
| R-STAT2      | 5'-AGCTGCCTCAGGTGAAACAA-3'       |               |                                                                             |

|          |                             |     |                   |
|----------|-----------------------------|-----|-------------------|
|          |                             |     | 60°C 1 min        |
| <hr/>    |                             |     |                   |
| F-STAT5A | 5'-GAAGATCAAGCTGGGGCACT-3'  | 114 | 50°C 2 min        |
| R-STAT5A | 5'-CGGACCAGCCTCTGTTCATT-3'  |     | 95°C 10 min       |
|          |                             |     | <u>45 cycles:</u> |
|          |                             |     | 95°C 20 sec       |
|          |                             |     | 60°C 1 min        |
| <hr/>    |                             |     |                   |
| F-AKT1   | 5'-GCGTGACCATGAACGAGTTT-3'  | 211 | 50°C 2 min        |
| R-AKT1   | 5'-CTTGGCCACGATGACTTCCT-3'  |     | 95°C 10 min       |
|          |                             |     | <u>45 cycles:</u> |
|          |                             |     | 95°C 20 sec       |
|          |                             |     | 60°C 1 min        |
| <hr/>    |                             |     |                   |
| FB-ACT   | 5'-CATTGCCGACAGGATGCA-3'    | 151 | 50°C 2 min        |
| RB-ACT   | 5'-GCTGATCCACATCTGCTGGA-3'  |     | 95°C 10 min       |
|          |                             |     | <u>45 cycles:</u> |
|          |                             |     | 95°C 20 sec       |
|          |                             |     | 60°C 1 min        |
| <hr/>    |                             |     |                   |
| RPL13aF  | 5'-GAAGATGGCGGAGGGGCAG-3'   | 126 | 50°C 2 min        |
| RPL13aF  | 5'-ATGCCTTCACAGCGTACGACC-3' |     | 95°C 10 min       |
|          |                             |     | <u>40 cycles:</u> |
|          |                             |     | 95°C 30 sec       |
|          |                             |     | 62°C 1 min        |
